# Supplementary material
Source: PubMed Central journal article supplement (PMC8609776)
Supplement: NIHMS1674074-supplement-supplemental_figures.pdf [file NIHMS1674074-supplement-supplemental_figures.pdf]

## Supplemental appendix

A.

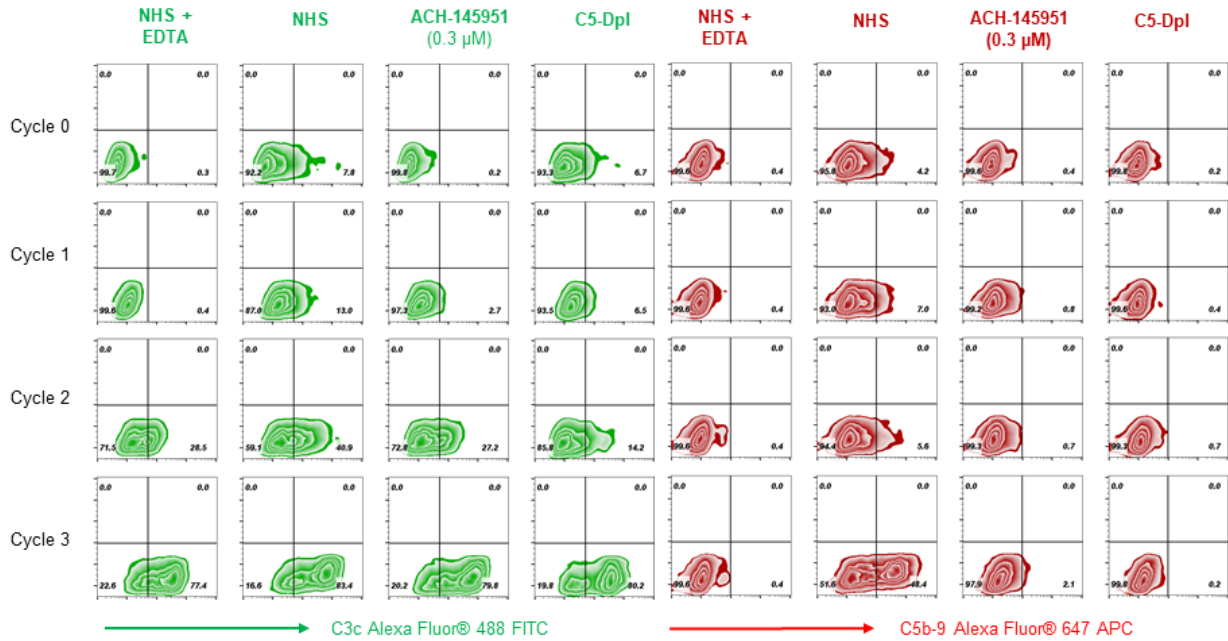

B.

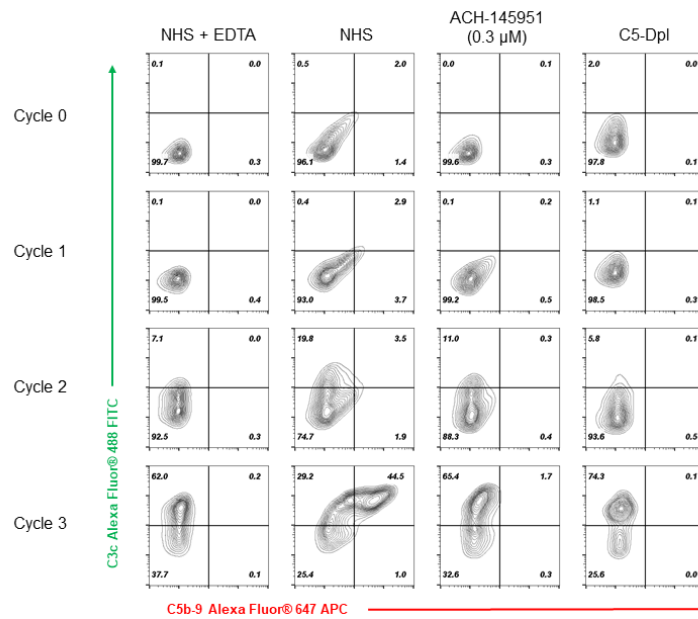

Suppl. Fig. 1 C3b loading increases C5b9 deposition on TF1 *PIGAnull* cells by flow cytometry. **(A)** Cells loaded with one to three cycles of C3b were incubated in 20% of NHS + EDTA, NHS, NHS + ACH-145951 and C5-depleted (C5-Dpl) serum. Zebra plots show C3c<sup>+</sup> (in green) on left graph and C5b-9<sup>+</sup> (in red) cells on the right graph. **(B)** Contour shows double positive for C3c (Y axis, Alexa 488) and C5b-9 (X axis, Alexa 647) (upper right). NHS + EDTA is negative control.

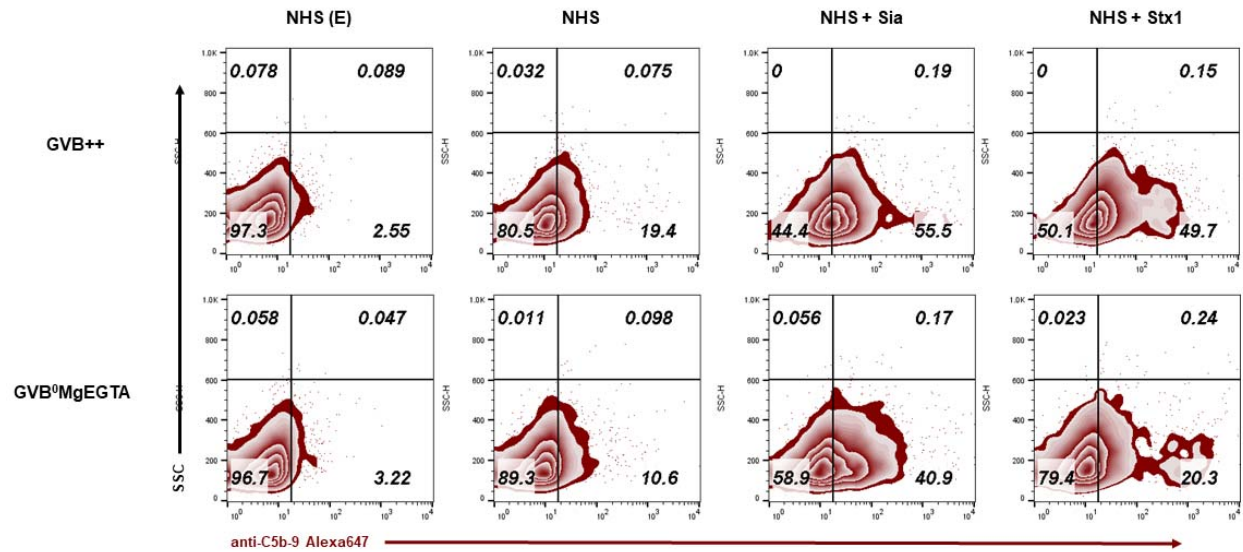

Suppl. Fig. 2 Comparison of C5b-9 deposition on TF1 *PIGAnull* cells induced by Sialidase (Sia) and Shiga toxin 1 (Stx1) in GVB<sup>++</sup> and GVB<sup>0</sup>EGTA buffers. FACS plot showing C5b-9 deposition following Sia and Stx1 treatment in GVB<sup>++</sup> (top panel) and GVB<sup>0</sup>EGTA (bottom panel) buffers. The C5b-9 deposition (%) induced by Sia and Stx1 was similar (55.5% vs. 49.7%) in GVB<sup>++</sup> buffer. However, the C5b-9 deposition caused by Stx1 (10 µg/ml) in GVB<sup>0</sup>EGTA buffer was reduced to 20.3%. NHS (E) normal serum + EDTA, NHS normal human serum.

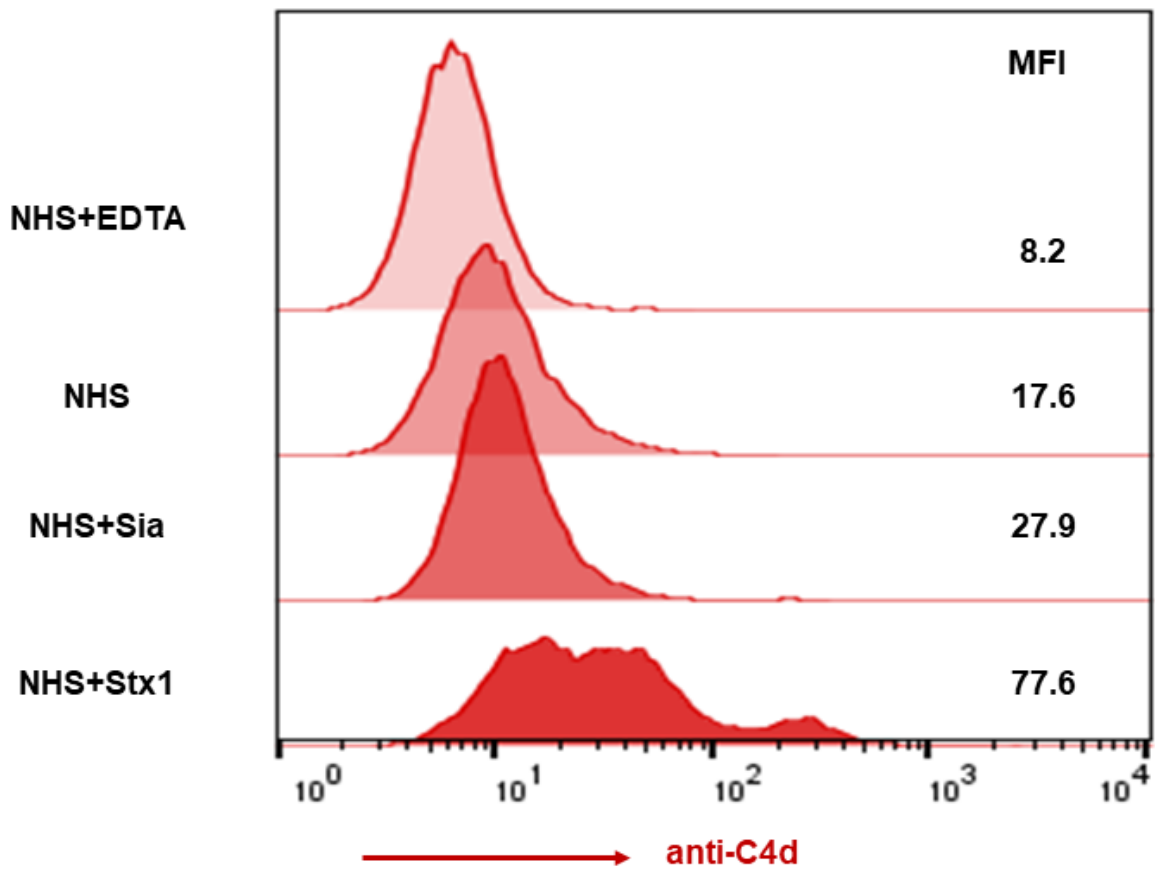

Suppl. Fig. 3 Shiga toxin 1 (Stx1) induced C4d deposition on TF1 *PIGAnull* cells in  $GVB^{++}$  by flow cytometry. TF1 *PIGAnull* cells were treated with Stx1 or Sia in  $GVB^{++}$  buffer. C4d deposition was measured following Sia and Stx1 treatment. Overlaid histograms show that MFI of C4d was markedly enhanced with Stx1 compared to Sia. MFI (mean fluorescence intensity).
